# Supplementary material
Source: PubMed Central journal article supplement (PMC10085530)
Supplement: NIHMS1883888-supplement-1.pdf [file NIHMS1883888-supplement-1.pdf]

## Supplementary Materials

Table S1

*Descriptive statistics of PID-5 and BFI-2 facets (n = 353)*

| Domains and facets         | <i>M</i> | <i>SD</i> | <i>Range</i> | <i>α</i> | <i>Mean IIC</i> |
|----------------------------|----------|-----------|--------------|----------|-----------------|
| PID Negative affectivity   |          |           |              |          |                 |
| Anxiousness                | 1.90     | 0.73      | 1 – 4        | 0.79     | 0.50            |
| Emotional lability         | 1.91     | 0.69      | 1 – 4        | 0.78     | 0.48            |
| Hostility                  | 2.14     | 0.62      | 1 – 4        | 0.69     | 0.36            |
| Perseveration              | 1.99     | 0.60      | 1 – 4        | 0.67     | 0.33            |
| Separation insecurity      | 2.11     | 0.60      | 1 – 4        | 0.54     | 0.23            |
| Submissiveness             | 2.05     | 0.58      | 1 – 4        | 0.67     | 0.34            |
| Restricted affectivity (-) | 2.96     | 0.57      | 1 – 4        | 0.52     | 0.21            |
| PID Detachment             |          |           |              |          |                 |
| Anhedonia                  | 1.48     | 0.51      | 1 – 4        | 0.67     | 0.36            |
| Suspiciousness             | 1.79     | 0.55      | 1 – 4        | 0.60     | 0.28            |
| Withdrawal                 | 1.55     | 0.54      | 1 – 4        | 0.64     | 0.32            |
| Depressivity               | 1.41     | 0.59      | 1 – 4        | 0.81     | 0.52            |
| Intimacy avoidance         | 1.88     | 0.68      | 1 – 4        | 0.73     | 0.41            |
| PID Antagonism             |          |           |              |          |                 |
| Attention seeking          | 2.08     | 0.61      | 1 – 4        | 0.78     | 0.40            |
| Callousness                | 1.46     | 0.56      | 1 – 3        | 0.78     | 0.47            |
| Deceitfulness              | 1.71     | 0.56      | 1 – 4        | 0.65     | 0.33            |
| Manipulativeness           | 1.89     | 0.59      | 1 – 4        | 0.70     | 0.37            |
| Grandiosity                | 1.48     | 0.55      | 1 – 4        | 0.74     | 0.42            |
| PID Disinhibition          |          |           |              |          |                 |
| Distractibility            | 2.56     | 0.86      | 1 – 4        | 0.88     | 0.65            |
| Impulsivity                | 2.24     | 0.55      | 1 – 4        | 0.50     | 0.19            |
| Irresponsibility           | 1.62     | 0.54      | 1 – 3        | 0.62     | 0.30            |
| Risk taking                | 2.17     | 0.77      | 1 – 4        | 0.84     | 0.57            |
| Rigid perfectionism (-)    | 2.98     | 0.65      | 1 – 4        | 0.68     | 0.34            |

Table S1 (continued)

| Domains and facets          | <i>M</i> | <i>SD</i> | <i>Range</i> | $\alpha$ | <i>Mean IIC</i> |
|-----------------------------|----------|-----------|--------------|----------|-----------------|
| PID Psychoticism            |          |           |              |          |                 |
| Eccentricity                | 1.97     | 0.75      | 1 – 4        | 0.79     | 0.49            |
| Perceptual dysregulation    | 1.56     | 0.52      | 1 – 3        | 0.60     | 0.28            |
| Unusual beliefs             | 1.77     | 0.67      | 1 – 4        | 0.69     | 0.35            |
| BFI Neuroticism             |          |           |              |          |                 |
| Anxiety                     | 3.08     | 0.75      | 1 – 5        | 0.63     | 0.30            |
| Emotional volatility        | 2.57     | 0.81      | 1 – 5        | 0.74     | 0.42            |
| Depression                  | 2.39     | 0.73      | 1 – 5        | 0.70     | 0.35            |
| BFI (low) Extraversion      |          |           |              |          |                 |
| (low) Energy level          | 2.39     | 0.63      | 1 – 5        | 0.63     | 0.29            |
| (low) Assertiveness         | 2.51     | 0.68      | 1 – 5        | 0.65     | 0.31            |
| (low) Sociability           | 2.41     | 0.73      | 1 – 5        | 0.71     | 0.39            |
| BFI (low) Agreeableness     |          |           |              |          |                 |
| (low) Trust                 | 2.52     | 0.61      | 1 – 5        | 0.58     | 0.26            |
| (low) Respectfulness        | 2.22     | 0.66      | 1 – 5        | 0.70     | 0.37            |
| (low) Compassion            | 2.21     | 0.67      | 1 – 4        | 0.66     | 0.34            |
| BFI (low) Conscientiousness |          |           |              |          |                 |
| (low) Organization          | 2.81     | 0.97      | 1 – 5        | 0.84     | 0.56            |
| (low) Productiveness        | 2.76     | 0.71      | 1 – 5        | 0.66     | 0.33            |
| (low) Responsibility        | 2.53     | 0.57      | 1 – 4        | 0.57     | 0.25            |
| BFI Openness                |          |           |              |          |                 |
| Intellectual curiosity      | 3.52     | 0.61      | 2 – 5        | 0.44     | 0.17            |
| Aesthetic sensitivity       | 2.87     | 1.01      | 1 – 5        | 0.78     | 0.47            |
| Creative imagination        | 3.70     | 0.79      | 1 – 5        | 0.75     | 0.42            |

*Note.* PID = Personality Inventory for DSM-5; BFI = Big Five Inventory-2; Low = Facets are transformed into reverse direction; *M* = mean; *SD* = standard deviation; Range = range of item responses in the current sample;  $\alpha$  = Cronbach's alpha; *IIC* = inter-item correlations.

Table S2

*Spearman correlations of PID-5 and BFI-2 facets*

| Facets                          | Facets |        |        |        |        |       |        |        |        |       |        |        |       |       |        |        |        |
|---------------------------------|--------|--------|--------|--------|--------|-------|--------|--------|--------|-------|--------|--------|-------|-------|--------|--------|--------|
|                                 | 1      | 2      | 3      | 4      | 5      | 6     | 7      | 8      | 9      | 10    | 11     | 12     | 13    | 14    | 15     | 16     | 17     |
| 1. PID Anxiousness              | 1      |        |        |        |        |       |        |        |        |       |        |        |       |       |        |        |        |
| 2. PID Emotional lability       | .50**  | 1      |        |        |        |       |        |        |        |       |        |        |       |       |        |        |        |
| 3. PID Hostility                | .27**  | .37**  | 1      |        |        |       |        |        |        |       |        |        |       |       |        |        |        |
| 4. PID Perseveration            | .40**  | .42**  | .44**  | 1      |        |       |        |        |        |       |        |        |       |       |        |        |        |
| 5. PID Restricted affect (-)    | -.13*  | -.03   | -.25** | -.23** | 1      |       |        |        |        |       |        |        |       |       |        |        |        |
| 6. PID Separation insecurity    | .28**  | .28**  | .16**  | .29**  | -.05   | 1     |        |        |        |       |        |        |       |       |        |        |        |
| 7. PID Submissiveness           | .25**  | .17**  | .13**  | .24**  | -.14*  | .23** | 1      |        |        |       |        |        |       |       |        |        |        |
| 8. PID Anhedonia                | .39**  | .32**  | .30**  | .40**  | -.37** | .17** | .16**  | 1      |        |       |        |        |       |       |        |        |        |
| 9. PID Depressivity             | .37**  | .38**  | .30**  | .32**  | -.33** | .22** | .21**  | .50**  | 1      |       |        |        |       |       |        |        |        |
| 10. PID Intimacy avoidance      | .12*   | .11*   | .08    | .12*   | -.22** | .04   | .02    | .19**  | .20**  | 1     |        |        |       |       |        |        |        |
| 11. PID Suspiciousness          | .44**  | .33**  | .34**  | .41**  | -.30** | .27** | .23**  | .48**  | .45**  | .14*  | 1      |        |       |       |        |        |        |
| 12. PID Withdrawal              | .29*   | .28**  | .21**  | .32**  | -.35** | .06   | .14*   | .50**  | .48**  | .29** | .36**  | 1      |       |       |        |        |        |
| 13. PID Attention seeking       | .08    | .07    | .23**  | .23**  | -.08   | .15** | .10    | -.01   | -.01   | -.11* | .19**  | -.06   | 1     |       |        |        |        |
| 14. PID Callousness             | -.01   | .07    | .30**  | .26**  | -.41** | -.03  | -.09   | .36**  | .30**  | .09   | .28**  | .37**  | .24** | 1     |        |        |        |
| 15. PID Deceitfulness           | .14*   | .21**  | .37**  | .39**  | -.31** | .20   | .13*   | .34**  | .26**  | .12*  | .40**  | .27**  | .35** | .54** | 1      |        |        |
| 16. PID Grandiosity             | .05    | .10    | .16**  | .25**  | -.16** | .07   | -.05   | .17**  | .11*   | .06   | .24**  | .17**  | .32** | .40** | .45**  | 1      |        |
| 17. PID Manipulativeness        | .05    | .05    | .23**  | .17**  | -.16** | .12*  | .03    | .15**  | .11*   | -.04  | .18**  | .08    | .38** | .33** | .54**  | .43**  | 1      |
| 18. PID Distractibility         | .20**  | .29**  | .45**  | .38**  | -.18** | .18** | .11*   | .25**  | .22**  | -.002 | .25**  | .48**  | .22** | .20** | .30**  | .13*   | .10    |
| 19. PID Impulsivity             | .19**  | .25**  | .44**  | .43**  | -.21** | .16** | -.18** | .23**  | .25**  | .02   | .32**  | .09    | .29** | .21** | .33**  | .13*   | .22**  |
| 20. PID Irresponsibility        | .30**  | .28**  | .44**  | .42**  | -.30** | .22** | .21**  | .37**  | .37**  | .08   | .34**  | .14**  | .28** | .40** | .50**  | .24**  | .30**  |
| 21. PID Rigid perfectionism (-) | -.38** | -.25** | -.15** | -.23** | .14**  | -.05  | -.14** | -.17** | -.20** | -.10  | -.22** | -.15** | -.11* | -.08  | -.21** | -.19** | -.26** |
| 22. PID Risk taking             | .01    | .02    | .32**  | .20**  | -.25** | .09   | -.01   | .18**  | .19**  | .08   | .30**  | .10    | .22** | .31** | .41**  | .26**  | .41**  |

Table S2 (continued)

| Facets                              | Facets |        |        |        |        |       |        |        |        |        |        |        |        |        |        |        |        |
|-------------------------------------|--------|--------|--------|--------|--------|-------|--------|--------|--------|--------|--------|--------|--------|--------|--------|--------|--------|
|                                     | 1      | 2      | 3      | 4      | 5      | 6     | 7      | 8      | 9      | 10     | 11     | 12     | 13     | 14     | 15     | 16     | 17     |
| 23. PID Eccentricity                | .41**  | .37**  | .40**  | .43**  | -.27** | .18** | .18**  | .35**  | .46**  | .15**  | .40**  | .38**  | .15**  | .25**  | .29**  | .17**  | .22**  |
| 24. PID Perceptual<br>dysregulation | .35**  | .38**  | .31**  | .38**  | -.19** | .23** | .22**  | .37**  | .38**  | .21**  | .46**  | .37**  | .16**  | .20**  | .46**  | .33**  | .31**  |
| 25. PID Unusual beliefs             | .32**  | .36**  | .37**  | .32**  | -.30** | .24** | .18**  | .28**  | .33**  | .06    | .49**  | .26**  | .14**  | .23**  | .41**  | .21**  | .30**  |
| 26. BFI Sociability                 | -.25** | -.18** | .004   | -.07   | .11*   | .02   | -.05   | -.21** | -.15** | -.15** | -.10   | -.38** | .34**  | .01    | .07    | .02    | .14*   |
| 27. BFI Assertiveness               | -.21** | .22**  | -.004  | -.21** | .03    | -.10  | -.24** | -.21** | -.15** | -.10   | -.12*  | -.26** | .22**  | .04    | .04    | .11*   | .35**  |
| 28. BFI Energy level                | -.23** | -.15** | -.09   | -.15** | .18**  | -.04  | -.11*  | -.40** | -.29** | -.10   | -.09   | -.39** | .22**  | -.12*  | -.02   | .04    | .11*   |
| 29. BFI Compassion                  | -.04   | -.03   | -.26** | -.27** | .33**  | .06   | -.04   | -.32** | -.23** | -.15** | -.21** | -.32** | -.09   | -.52** | -.32** | -.28** | -.19** |
| 30. BFI Respectfulness              | -.03   | -.14** | -.48** | -.35** | .23**  | -.02  | .002   | -.23** | -.21** | .02    | -.16** | -.16** | -.26** | -.39** | -.35** | -.23** | -.26** |
| 31. BFI Trust                       | -.15** | -.15** | -.35** | -.33** | .19**  | -.02  | .04    | -.33** | -.28** | -.14** | -.26** | -.31** | -.08   | -.44** | -.34** | -.31** | -.25** |
| 32. BFI Organization                | -.07   | -.17** | -.30** | -.26** | .16**  | -.07  | -.03   | -.21** | -.17** | -.04   | -.13*  | -.15** | -.17** | -.16** | -.21** | -.02   | -.10   |
| 33. BFI Productiveness              | -.16** | -.21** | -.33** | -.36** | .15**  | -.12* | -.10   | -.26** | -.18** | -.01   | -.18** | -.14** | -.19** | -.16** | -.23** | -.11*  | -.12*  |
| 34. BFI Responsibility              | -.23** | -.20** | -.41** | -.37** | .21**  | -.11  | -.12   | -.24** | -.25** | -.10   | -.20** | -.25** | -.20** | -.27** | -.32** | -.18** | -.15** |
| 35. BFI Anxiety                     | .56**  | .51**  | -.28** | -.19** | .08    | .22** | .10    | .20**  | .25**  | .04    | .23**  | .19**  | -.06   | -.15** | .01    | -.07   | -.12*  |
| 36. BFI Depression                  | .53**  | .47**  | .32**  | .28**  | -.09   | .21** | .14**  | .43**  | .45**  | .06    | .36**  | .35**  | -.10   | .02    | .08    | -.04   | -.09   |
| 37. BFI Emotional volatility        | .47**  | .60**  | .33**  | .25**  | .10    | .23** | .15**  | .23**  | .23**  | .09    | .18**  | .23**  | -.01   | -.08   | -.02   | .01    | -.10   |
| 38. BFI Intellectual<br>curiosity   | .25**  | .09    | -.07   | -.03   | .01    | .20   | .01    | .02    | .01    | .06    | .12*   | .22    | -.08   | -.11*  | -.08   | -.08   | .01    |
| 39. BFI Aesthetic<br>sensitivity    | .29**  | .18**  | -.09   | -.02   | .13*   | .03   | .03    | -.03   | .06    | .07    | .05    | .04    | -.04   | -.17** | -.07   | -.14** | .09    |
| 40. BFI Creative<br>Imagination     | .04    | .02    | -.19** | -.15** | .10    | -.07  | -.04   | -.17** | -.03   | -.03   | .03    | -.03   | -.01   | -.12   | -.09   | -.05   | .05    |

Table S2 (continued)

| Facets                           |        |        |        |        |        |        |        |        |        |        |        |        |       |        |        |        |        |
|----------------------------------|--------|--------|--------|--------|--------|--------|--------|--------|--------|--------|--------|--------|-------|--------|--------|--------|--------|
|                                  | 18     | 19     | 20     | 21     | 22     | 23     | 24     | 25     | 26     | 27     | 28     | 29     | 30    | 31     | 32     | 33     | 34     |
| 18. PID Distractibility          | 1      |        |        |        |        |        |        |        |        |        |        |        |       |        |        |        |        |
| 19. PID Impulsivity              | .45**  | 1      |        |        |        |        |        |        |        |        |        |        |       |        |        |        |        |
| 20. PID Irresponsibility         | .42**  | .38**  | 1      |        |        |        |        |        |        |        |        |        |       |        |        |        |        |
| 21. PID Rigid perfectionism (-)  | .02    | -.09   | -.17** | 1      |        |        |        |        |        |        |        |        |       |        |        |        |        |
| 22. PID Risk taking              | .26**  | .34**  | .36**  | -.13*  | 1      |        |        |        |        |        |        |        |       |        |        |        |        |
| 23. PID Eccentricity             | .30**  | .38**  | .50**  | -.24** | .24**  | 1      |        |        |        |        |        |        |       |        |        |        |        |
| 24. PID Perceptual dysregulation | .16**  | .26**  | .42**  | -.31** | .26**  | .50**  | 1      |        |        |        |        |        |       |        |        |        |        |
| 25. PID Unusual beliefs          | .24**  | .29**  | .42**  | -.28** | .30**  | .51**  | .62**  | 1      |        |        |        |        |       |        |        |        |        |
| 26. BFI Sociability              | .12*   | .17**  | .002   | .08    | .25**  | -.19** | -.11*  | -.04   | 1      |        |        |        |       |        |        |        |        |
| 27. BFI Assertiveness            | -.09   | -.003  | -.08   | -.06   | .31**  | -.10   | -.11*  | .01    | .42**  | 1      |        |        |       |        |        |        |        |
| 28. BFI Energy level             | .03    | .03    | -.07   | .03    | .20**  | -.13*  | -.17** | .03    | .50**  | .42**  | 1      |        |       |        |        |        |        |
| 29. BFI Compassion               | -.07   | -.20** | -.26** | -.01   | -.13*  | -.24** | -.20** | -.17** | .14*   | .10    | .31**  | 1      |       |        |        |        |        |
| 30. BFI Respectfulness           | -.27** | -.41** | -.41** | -.04   | -.29** | -.27** | -.21** | -.24** | -.08   | -.05   | .06    | .51**  | 1     |        |        |        |        |
| 31. BFI Trust                    | -.14** | -.19** | -.27** | .16**  | -.15** | -.32** | -.25** | -.19** | .12*   | .07    | .27**  | .49**  | .45** | 1      |        |        |        |
| 32. BFI Organization             | -.41** | -.34** | -.35** | -.24** | -.16** | -.25** | -.09   | -.09   | .04    | .04    | .10    | .21**  | .38** | .15**  | 1      |        |        |
| 33. BFI Productiveness           | -.49** | -.34** | -.37** | -.08   | -.12*  | -.21** | -.12*  | -.10   | .05    | .20**  | .22**  | .27**  | .36** | .32**  | .53**  | 1      |        |
| 34. BFI Responsibility           | -.33** | -.37** | -.50** | -.03   | -.18** | -.34** | -.18** | -.19** | .07    | .05    | .24**  | .41**  | .47** | .35**  | .44**  | .48**  | 1      |
| 35. BFI Anxiety                  | .24**  | .10    | .10    | -.21** | -.06   | .20**  | .16**  | .18**  | -.23** | .07    | -.14** | .09    | .03   | -.09   | -.12*  | -.13*  | -.14** |
| 36. BFI Depression               | .18**  | .14**  | .19**  | -.17** | -.04   | .30**  | .22**  | .20**  | -.32** | -.32** | -.40** | -.16** | -.14* | -.28** | -.19** | -.25** | -.31** |
| 37. BFI Emotional volatility     | .16**  | .15**  | .15**  | -.18** | -.12*  | .28**  | .21**  | .21**  | -.26** | -.26** | -.27** | -.03   | -.12* | -.19** | -.14** | -.22** | -.23** |
| 38. BFI Intellectual curiosity   | -.09   | -.07   | -.03   | -.16** | .03    | .17**  | .04    | .18**  | -.12*  | -.12*  | .02    | .18**  | .18** | .09    | .09    | .18**  | .13**  |
| 39. BFI Aesthetic sensitivity    | .03    | -.06   | .02    | -.12*  | -.06   | .14    | .05    | .06    | -.10   | -.10   | .04    | .23**  | .16** | .12*   | -.03   | .03    | -.05   |
| 40. BFI Creative Imagination     | -.06   | -.09   | -.08   | -.06   | -.04   | .10    | -.04   | -.02   | -.02   | -.02   | .21**  | .19**  | .20** | .22**  | .10    | .10    | .17**  |

Table S2 (*continued*)

| Facets                         |       |       |       |       |       |    |
|--------------------------------|-------|-------|-------|-------|-------|----|
|                                | 35    | 36    | 37    | 38    | 39    | 40 |
| 35. BFI Anxiety                | 1     |       |       |       |       |    |
| 36. BFI Depression             | .55** | 1     |       |       |       |    |
| 37. BFI Emotional volatility   | .61** | .62** | 1     |       |       |    |
| 38. BFI Intellectual curiosity | .12*  | .07   | .01   | 1     |       |    |
| 39. BFI Aesthetic sensitivity  | .26** | .15** | .18** | .39** | 1     |    |
| 40. BFI Creative Imagination   | -.12* | -.12* | -.01  | .36** | .42** | 1  |

*Note.* \*  $p < .05$ ; \*\*  $p < .001$ . BFI = Big Five Inventory-2; PID = Personality Inventory for DSM-5.

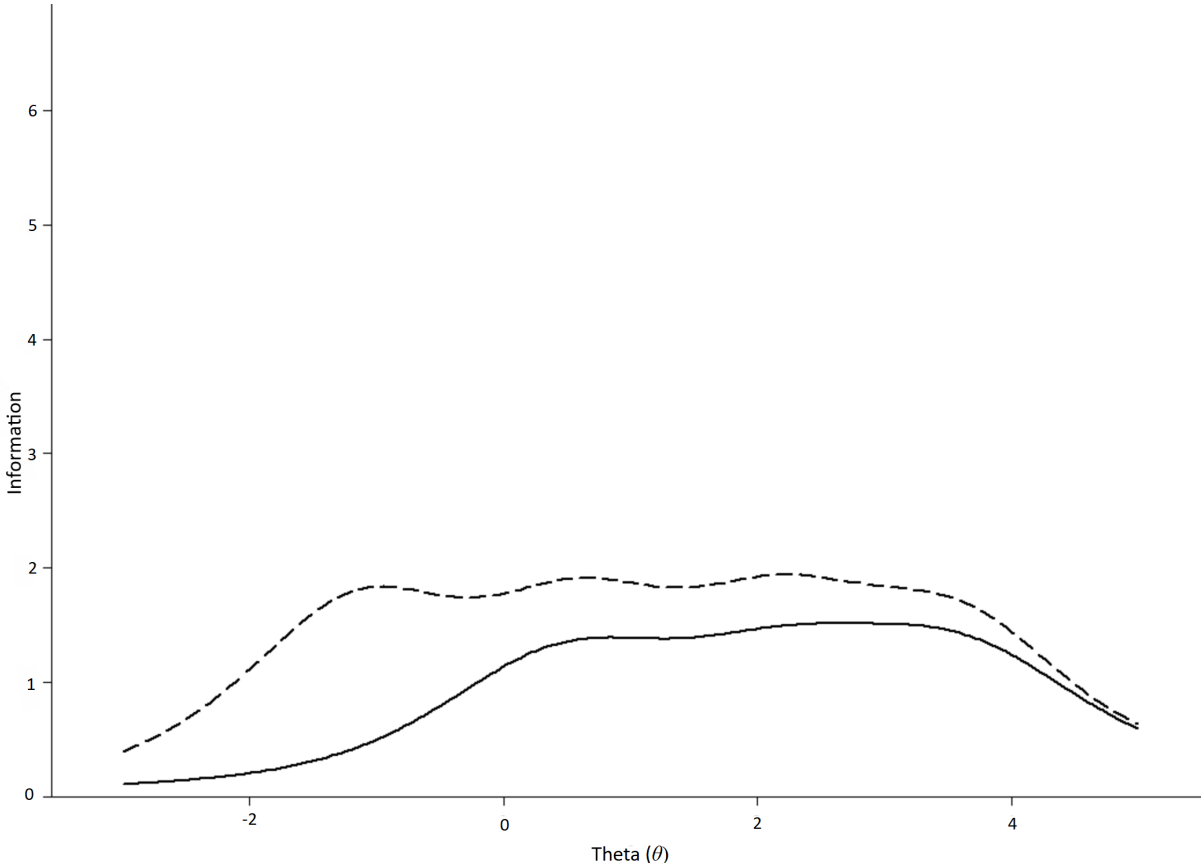

Figure S1. Test information curves for BFI-2 Extraversion (dashed line) and PID-5 Detachment without facet Depressivity (solid line). Note. PID-5 = Personality Inventory for DSM-5; BFI-2 = Big Five Inventory-2; Theta = latent dimension (i.e., personality).
